# Supplementary material for: Amorphous Co3O4 quantum dots hybridizing with 3D hexagonal CdS single crystals to construct a 0D/3D p–n heterojunction for a highly efficient photocatalytic H2 evolution
Source: Royal Society of Chemistry journal article supplement (doi:10.1039/d1dt01333e), 2021-01-01
Supplement: d1dt01333e1.pdf [file d1dt01333e1.pdf]

## Supporting information for

### **Amorphous Co<sub>3</sub>O<sub>4</sub> quantum dots hybridizing with 3D hexagonal CdS single crystals to construct 0D/3D p-n heterojunction for highly efficient photocatalytic H<sub>2</sub> evolution**

Xuqiang Hao<sup>1, 2, 3\*</sup>, Dingzhou Xiang<sup>1, 2, 3</sup>, Zhiliang Jin<sup>1, 2, 3\*</sup>

*1. School of Chemistry and Chemical Engineering, North Minzu University, Yinchuan 750021, P.R.China*

*2. Ningxia Key Laboratory of Solar Chemical Conversion Technology, North Minzu University, Yinchuan 750021, P.R.China*

*3. Key Laboratory for Chemical Engineering and Technology, State Ethnic Affairs Commission, North Minzu University, Yinchuan 750021, P.R.China*

\*Corresponding author: [haoxuqiang@126.com](mailto:haoxuqiang@126.com) (X.Q. Hao) [zl-jin@nun.edu.cn](mailto:zl-jin@nun.edu.cn) (Z.L. Jin).

**Table S1** performance comparison of noble-metal-free photocatalysts for H<sub>2</sub> production

| Photocatalyst                       | Light source                                   | Sacrificial agents                                | Production rate                            | Refs      |
|-------------------------------------|------------------------------------------------|---------------------------------------------------|--------------------------------------------|-----------|
| CQDs/CdS                            | 5W LED<br>( $\lambda \geq 420\text{nm}$ )      | Na <sub>2</sub> S/Na <sub>2</sub> SO <sub>3</sub> | 17.5 mmol h <sup>-1</sup> g <sup>-1</sup>  | This work |
| CdS-NCS                             | 350W Xe<br>lamp( $\lambda \geq 420\text{nm}$ ) | Na <sub>2</sub> S/Na <sub>2</sub> SO <sub>3</sub> | 6.86 mmol h <sup>-1</sup> g <sup>-1</sup>  | [1]       |
| CdS@WO <sub>3</sub> /CoP            | 5W LED<br>( $\lambda \geq 420\text{nm}$ )      | lactic acid                                       | 14.73 mmol h <sup>-1</sup> g <sup>-1</sup> | [2]       |
| TiO <sub>2</sub> /CdS               | 350W Xe<br>lamp( $\lambda \geq 420\text{nm}$ ) | methanol                                          | 2.32 mmol h <sup>-1</sup> g <sup>-1</sup>  | [3]       |
| CdS/VC                              | 300W Xe<br>lamp( $\lambda \geq 420\text{nm}$ ) | lactic acid                                       | 14.2 mmol h <sup>-1</sup> g <sup>-1</sup>  | [4]       |
| CMo/CdS                             | 300W Xe<br>lamp( $\lambda \geq 420\text{nm}$ ) | lactic acid                                       | 12.38 mmol h <sup>-1</sup> g <sup>-1</sup> | [5]       |
| Co <sub>9</sub> S <sub>8</sub> /CdS | 300W Xe<br>lamp( $\lambda \geq 420\text{nm}$ ) | Na <sub>2</sub> S/Na <sub>2</sub> SO <sub>3</sub> | 5.15 mmol h <sup>-1</sup> g <sup>-1</sup>  | [6]       |
| CdS/Sn                              | 300W Xe<br>lamp( $\lambda \geq 420\text{nm}$ ) | glycerol                                          | 1.61 mmol h <sup>-1</sup> g <sup>-1</sup>  | [7]       |
| P-MoS <sub>2</sub> /CdS             | 300W Xe<br>lamp( $\lambda \geq 420\text{nm}$ ) | Na <sub>2</sub> S/Na <sub>2</sub> SO <sub>3</sub> | 5.89 mmol h <sup>-1</sup> g <sup>-1</sup>  | [8]       |
| CdS/PI                              | 300W Xe<br>lamp( $\lambda \geq 420\text{nm}$ ) | lactic acid                                       | 0.613 mmol h <sup>-1</sup> g <sup>-1</sup> | [9]       |
| CdS/MOF-5                           | 300W Xe<br>lamp( $\lambda \geq 420\text{nm}$ ) | Na <sub>2</sub> S/Na <sub>2</sub> SO <sub>3</sub> | 11.62 mmol h <sup>-1</sup> g <sup>-1</sup> | [10]      |

**References:**

- [1] Wei Zhong, Ying Huang, Xuefei Wang, Jijie Fan, Huogen Yu. Colloidal CdS and CdZnS nanocrystal photocatalysts with massive S<sup>2-</sup>-adsorption: one-step facile synthesis and highly efficient H<sub>2</sub>-evolution performance. *Chemical Communications*. 2020, 56, 9316-9319.
- [2] Yupeng Zhang, Xuqiang Hao, Xiaoli Ma, Hai Liu, Zhiliang Jin. Special Z-scheme CdS@WO<sub>3</sub> hetero-junction modified with CoP for efficient hydrogen evolution, *International Journal of*

- Hydrogen Energy. 2019, 44, 13232-13241.
- [3] Haonan Ge, Feiyan Xu, Bei Cheng, Jiaguo Yu, Wingkei Ho. S-Scheme Heterojunction TiO<sub>2</sub>/CdS Nanocomposite Nanofiber as H<sub>2</sub>-Production Photocatalyst. *ChemCatChem*. 2019, 11, 6301-6309.
- [4] Lei Tian, Shixiong Min, Fang Wang. Integrating noble-metal-free metallic vanadium carbide cocatalyst with CdS for efficient visible-light-driven photocatalytic H<sub>2</sub> evolution. *Applied Catalysis B: Environmental*. 2019, 259, 118029.
- [5] Chang Feng, Zhuoyuan Chen, Jian Hou, Jiarun Li, Xiangbo Li, Likun Xu, Mingxian Sun, Rongchang Zeng. Effectively enhanced photocatalytic hydrogen production performance of one-pot synthesized MoS<sub>2</sub> clusters/CdS nanorod heterojunction material under visible light. *Chemical Engineering Journal*. 2018, 345, 404-413.
- [6] Pengfei Tan, Yi Liu, Anquan Zhu, Weixuan Zeng, Hao Cui, Jun Pan. Rational design of Z-scheme system based on 3D hierarchical CdS supported 0D Co<sub>9</sub>S<sub>8</sub> nanoparticles for superior photocatalytic H<sub>2</sub> generation. *ACS Sustainable Chemistry & Engineering*. 2018, 6, 10385-10394.
- [7] Xianglin Xiang, Bicheng Zhu, Bei Cheng, Jiaguo Yu, Hongjin Lv. Enhanced Photocatalytic H<sub>2</sub>-Production Activity of CdS Quantum Dots Using Sn<sup>2+</sup> as Cocatalyst under Visible Light Irradiation. *Small*, 2020, 16, 2001024.
- [8] Jixiang Xu, Xuemei Yan, Yinhong Qi, Yunlei Fu, Chao Wang, Lei Wang. Novel phosphidated MoS<sub>2</sub> nanosheets modified CdS semiconductor for an efficient photocatalytic H<sub>2</sub> evolution. *Chemical Engineering Journal*. 2019, 375, 122053.
- [9] Yue Hu, Xuqiang Hao, Zhiwei Cui, Jun Zhou, Siqi Cu, Ying Wang, Zhigang Zou. Enhanced photocarrier separation in conjugated polymer engineered CdS for direct Z-scheme photocatalytic hydrogen evolution. *Applied Catalysis B: Environmental*. 2020, 260, 118131.
- [10] Xuqiang Hao, Zhiwei Cui, Jun Zhou, Yicong Wang, Yue Hu, Ying Wang, Zhigang Zou. Architecture of high efficient zinc vacancy mediated Z-scheme photocatalyst from metal-organic frameworks. *Nano Energy*. 2018, 52, 105-116.
